# Supplementary material for: A novel parametric approach to mine gene regulatory relationship from microarray datasets
Source: PubMed Central journal article supplement (PMC3024862; doi:10.1186/1471-2105-11-s11-s15), 2010-12-14

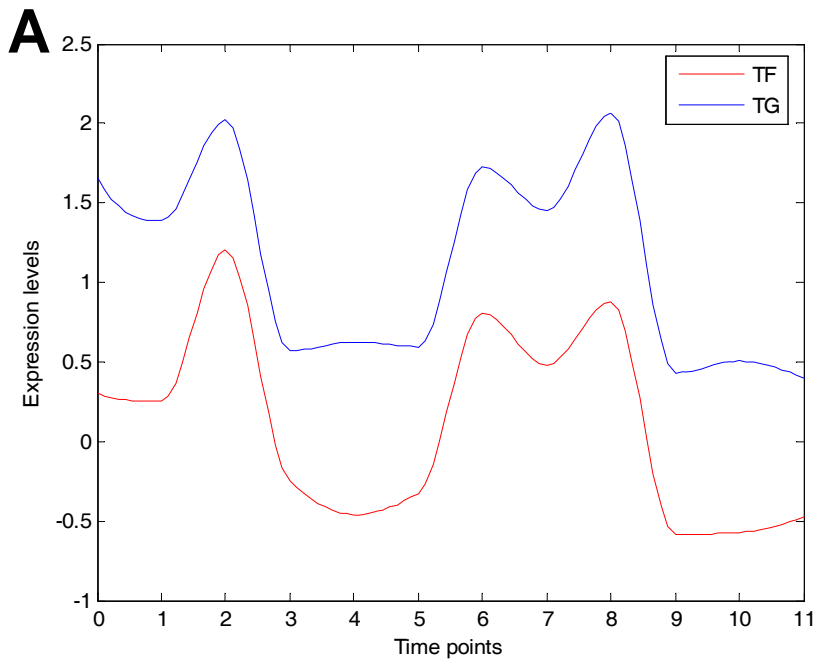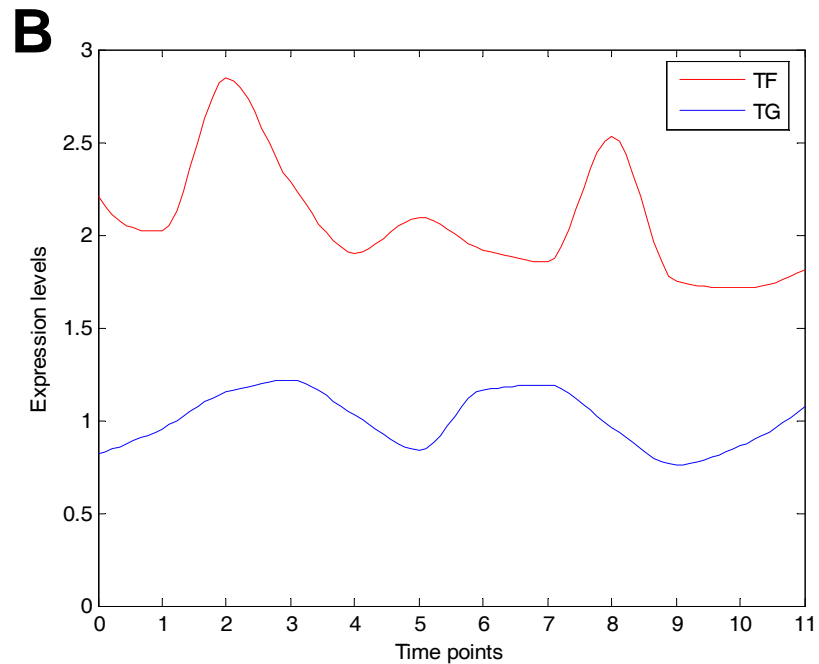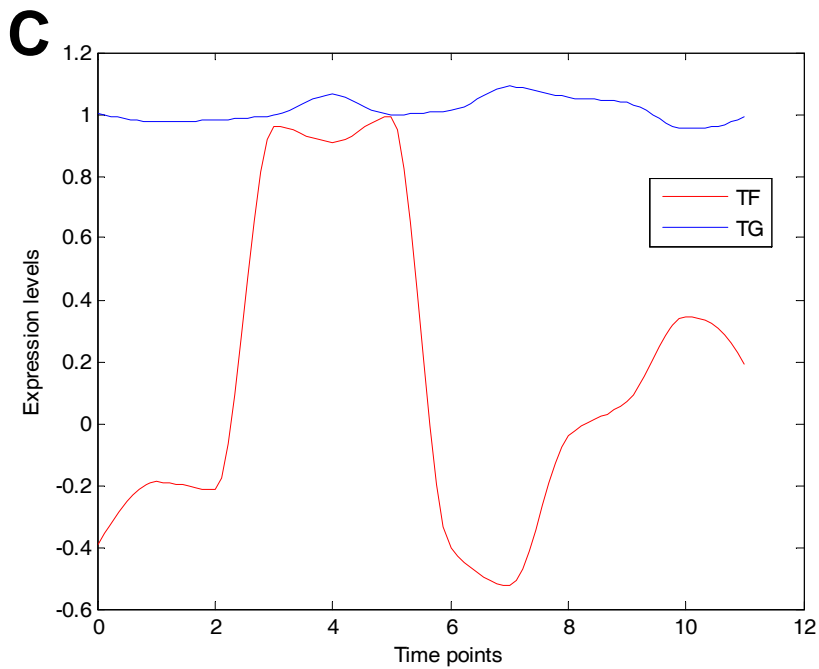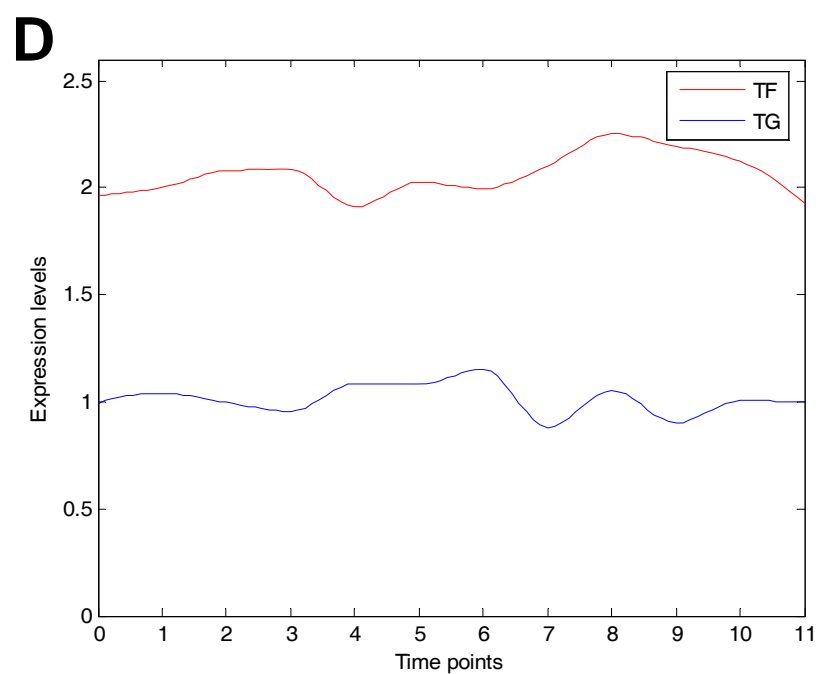

Supplement: 1471-2105-11-S11-S15-S1.pdf [file 1471-2105-11-S11-S15-S1.pdf]
