# Supplementary material for: A novel parametric approach to mine gene regulatory relationship from microarray datasets
Source: PubMed Central journal article supplement (PMC3024862; doi:10.1186/1471-2105-11-s11-s15), 2010-12-14
Supplement: 1471-2105-11-S11-S15-S3.pdf [file 1471-2105-11-S11-S15-S3.pdf]

### **Additional file 3 - Area under the curve of ROC.**

Our proposed model has a relative large AUC (0.8), which suggests it is able to predict regulations efficiently.

P\_E: PCC-ELD; M\_S:  $\Delta\text{mean}-\Delta\delta$ ; M\_T:  $|x|-\theta$ .

| Parameters      | AUC         |
|-----------------|-------------|
| PCC             | 0.65        |
| ELD             | 0.68        |
| P_E             | 0.77        |
| M_S             | 0.57        |
| M_T             | 0.68        |
| GO              | 0.68        |
| <b>Bayesian</b> | <b>0.80</b> |
